# Supplementary material for: Downregulation of CAMK2N1 due to DNA Hypermethylation Mediated by DNMT1 Promotes the Progression of Prostate Cancer
Source: Research Square preprint supplement (doi:10.21203/rs.3.rs-1323994/v1), 2022-02-15
Supplement: Supplementary file 1 [file 609367c5a411d59df6a38b23.docx]

## Table S1. Clinicopathological characteristics of the prostate tissue samples.

|  | Prostate cancer | Benign prostatic hyperplasia |
| --- | --- | --- |
| Total number | 52 | 16 |
| Age in years, mean (range) | 67 (53-79) | 69 (60-85) |
| TNM stage* |  |  |
| T2, n | 15 |  |
| T3, n | 8 |  |
| T4, n | 9 |  |
| Gleason scores |  |  |
| 6, n | 8 |  |
| 7, n | 19 |  |
| 8-10, n | 25 |  |
| PSA values ng/ml, mean (range) | 53.13 (0.008-647) |  |
| <10, n | 17 |  |
| 10-20, n | 10 |  |
| >20, n | 25 |  |

***: TNM stages were not available for all patients.**
